# Supplementary material for: The Association Between Benign Prostatic Hyperplasia in American Adult Males and Oxidative Balance Score
Source: Research Square preprint supplement (doi:10.21203/rs.3.rs-6906928/v1), 2025-06-29
Supplement: Supplementary file 1 [file 204b0e0bb8c288ec6f05ee33.docx]

| OBS components | Score | | |
| --- | --- | --- | --- |
|  | 0 | 1 | 2 |
| Antioxidant |  |  |  |
| dietary fiber (g/d) | ＜12.90 | 12.90-20.60 | ＞20.60 |
| β-carotene (mcg/d) | ＜28.00 | 28.00-124.00 | ＞124.00 |
| riboflavin (mg/d) | ＜1.79 | 1.79-2.68 | ＞2.68 |
| niacin (mg/d) | ＜20.10 | 20.10-30.36 | ＞30.36 |
| vitamin B6 (mg/d) | ＜1.56 | 1.56-2.42 | ＞2.42 |
| total folate (mcg/d) | ＜311.00 | 311.00-482.00 | ＞482.00 |
| vitamin B12 (mcg/d) | ＜3.26 | 3.26-6.10 | ＞6.10 |
| vitamin C (mg/d) | ＜37.30 | 37.30-104.80 | ＞104.80 |
| vitamin E (mg/d) | ＜5.50 | 5.50-9.37 | ＞9.37 |
| calcium (mg/d) | ＜643.00 | 643.00-1071.00 | ＞1071.00 |
| magnesium (mg/d) | ＜252.00 | 252.00-362.00 | ＞362.00 |
| zinc (mg/d) | ＜9.14 | 9.14-14.34 | ＞14.34 |
| copper (mg/d) | ＜1.04 | 1.04-1.53 | ＞1.53 |
| selenium (mcg/d) | ＜92.10 | 92.10-137.60 | ＞137.60 |
| physical activity  (MET-minute/week) | ＜320.00 | 320.00-819.00 | ＞819.00 |
| Pro-oxidant |  |  |  |
| total fat (g/d) | ＞104.21 | 67.66-104.21 | ＜67.66 |
| iron (mg/d) | ＞18.44 | 12.11-18.44 | ＜12.11 |
| BMI (kg/m2) | ≥30 | 25-30 | ＜25 |
| alcohol (g/d) | ≥30 | 0-30 | ＜0 |
| cotinine (ng/ml) | ＞0.29 | 0.02-0.29 | ＜0.02 |

Supplementary Table 1: Oxidative Balance Score assignment scheme.
